# Supplementary material for: Local cortical desynchronization and pupil-linked arousal differentially shape brain states for optimal sensory performance
Source: eLife journal article supplement (doi:10.7554/elife.51501), 2019-12-10
Supplement: supp [file elife-51501-supp-v1.zip]

Archive with 20 entries (20 files):
- elife_poa_e51501_Supplementary_file_10.docx
- elife_poa_e51501_Figure_6_figure_supplement_1.pdf
- elife_poa_e51501_Transparent_Reporting_File.pdf
- elife_poa_e51501_Supplementary_file_7.docx
- elife_poa_e51501_Supplementary_file_2.docx
- elife_poa_e51501_Figure_5_figure_supplement_1.pdf
- elife_poa_e51501_Supplementary_file_12.docx
- elife_poa_e51501_Supplementary_file_11.docx
- elife_poa_e51501_Figure_4_figure_supplement_2.pdf
- elife_poa_e51501_Supplementary_file_6.docx
- elife_poa_e51501_Supplementary_file_4.docx
- elife_poa_e51501_Supplementary_file_1.docx
- elife_poa_e51501_Figure_5_figure_supplement_2.pdf
- elife_poa_e51501_Supplementary_file_3.docx
- elife_poa_e51501_Supplementary_file_8.docx
- elife_poa_e51501_Figure_4_figure_supplement_1.pdf
- elife_poa_e51501_Figure_2_figure_supplement_1.pdf
- elife_poa_e51501_Supplementary_file_5.docx
- elife_poa_e51501_Figure_3_figure_supplement_1.pdf
- elife_poa_e51501_Supplementary_file_9.docx
