# Supplementary material for: Local cortical desynchronization and pupil-linked arousal differentially shape brain states for optimal sensory performance
Source: eLife journal article supplement (doi:10.7554/elife.51501), 2019-12-10
Supplement: supp [file elife-51501-supp-v1.zip › elife_poa_e51501_Figure_6_figure_supplement_1.pdf]

Model based on entropy over

Auditory cortex

Visual cortex

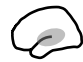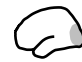

1-Criterion

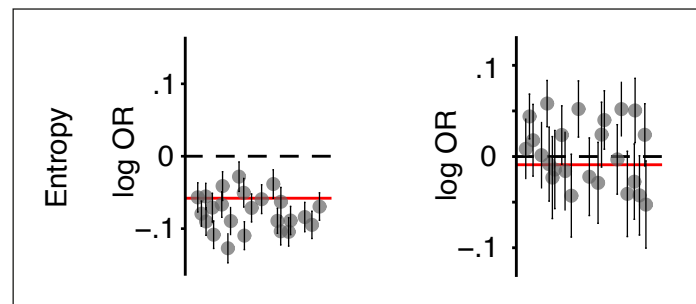

Sensitivity

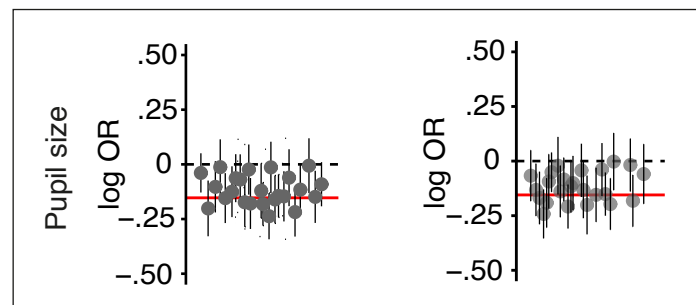

● Random slope

■ Fixed effect
