# Supplementary figures and images for: Local cortical desynchronization and pupil-linked arousal differentially shape brain states for optimal sensory performance
Source: eLife journal article supplement (doi:10.7554/elife.51501), 2019-12-10

# 1-Criterion

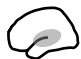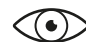

linear

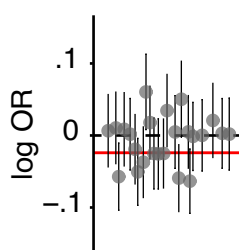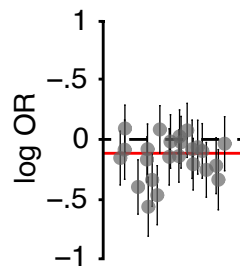

quadratic

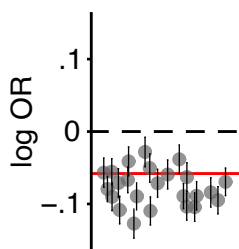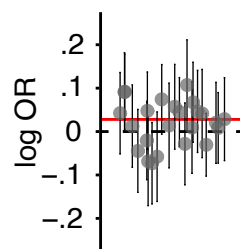

# Sensitivity

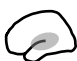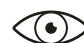

linear

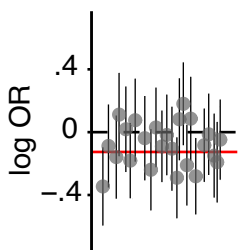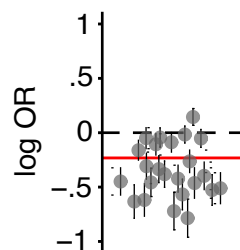

quadratic

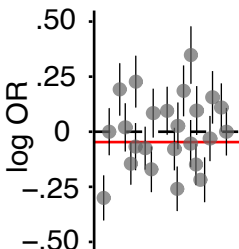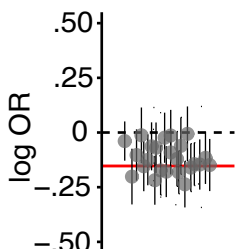

Supplement: supp [file elife-51501-supp-v1.zip › elife_poa_e51501_Figure_5_figure_supplement_1.pdf]

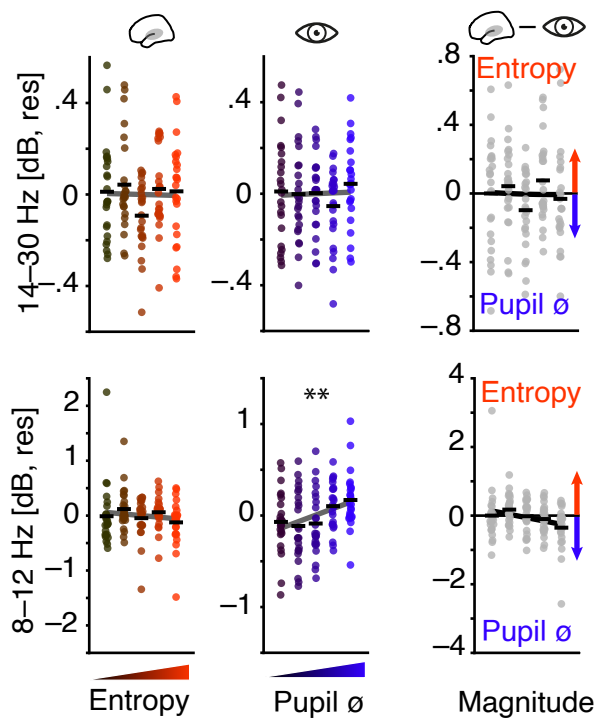

Supplement: supp [file elife-51501-supp-v1.zip › elife_poa_e51501_Figure_4_figure_supplement_2.pdf]

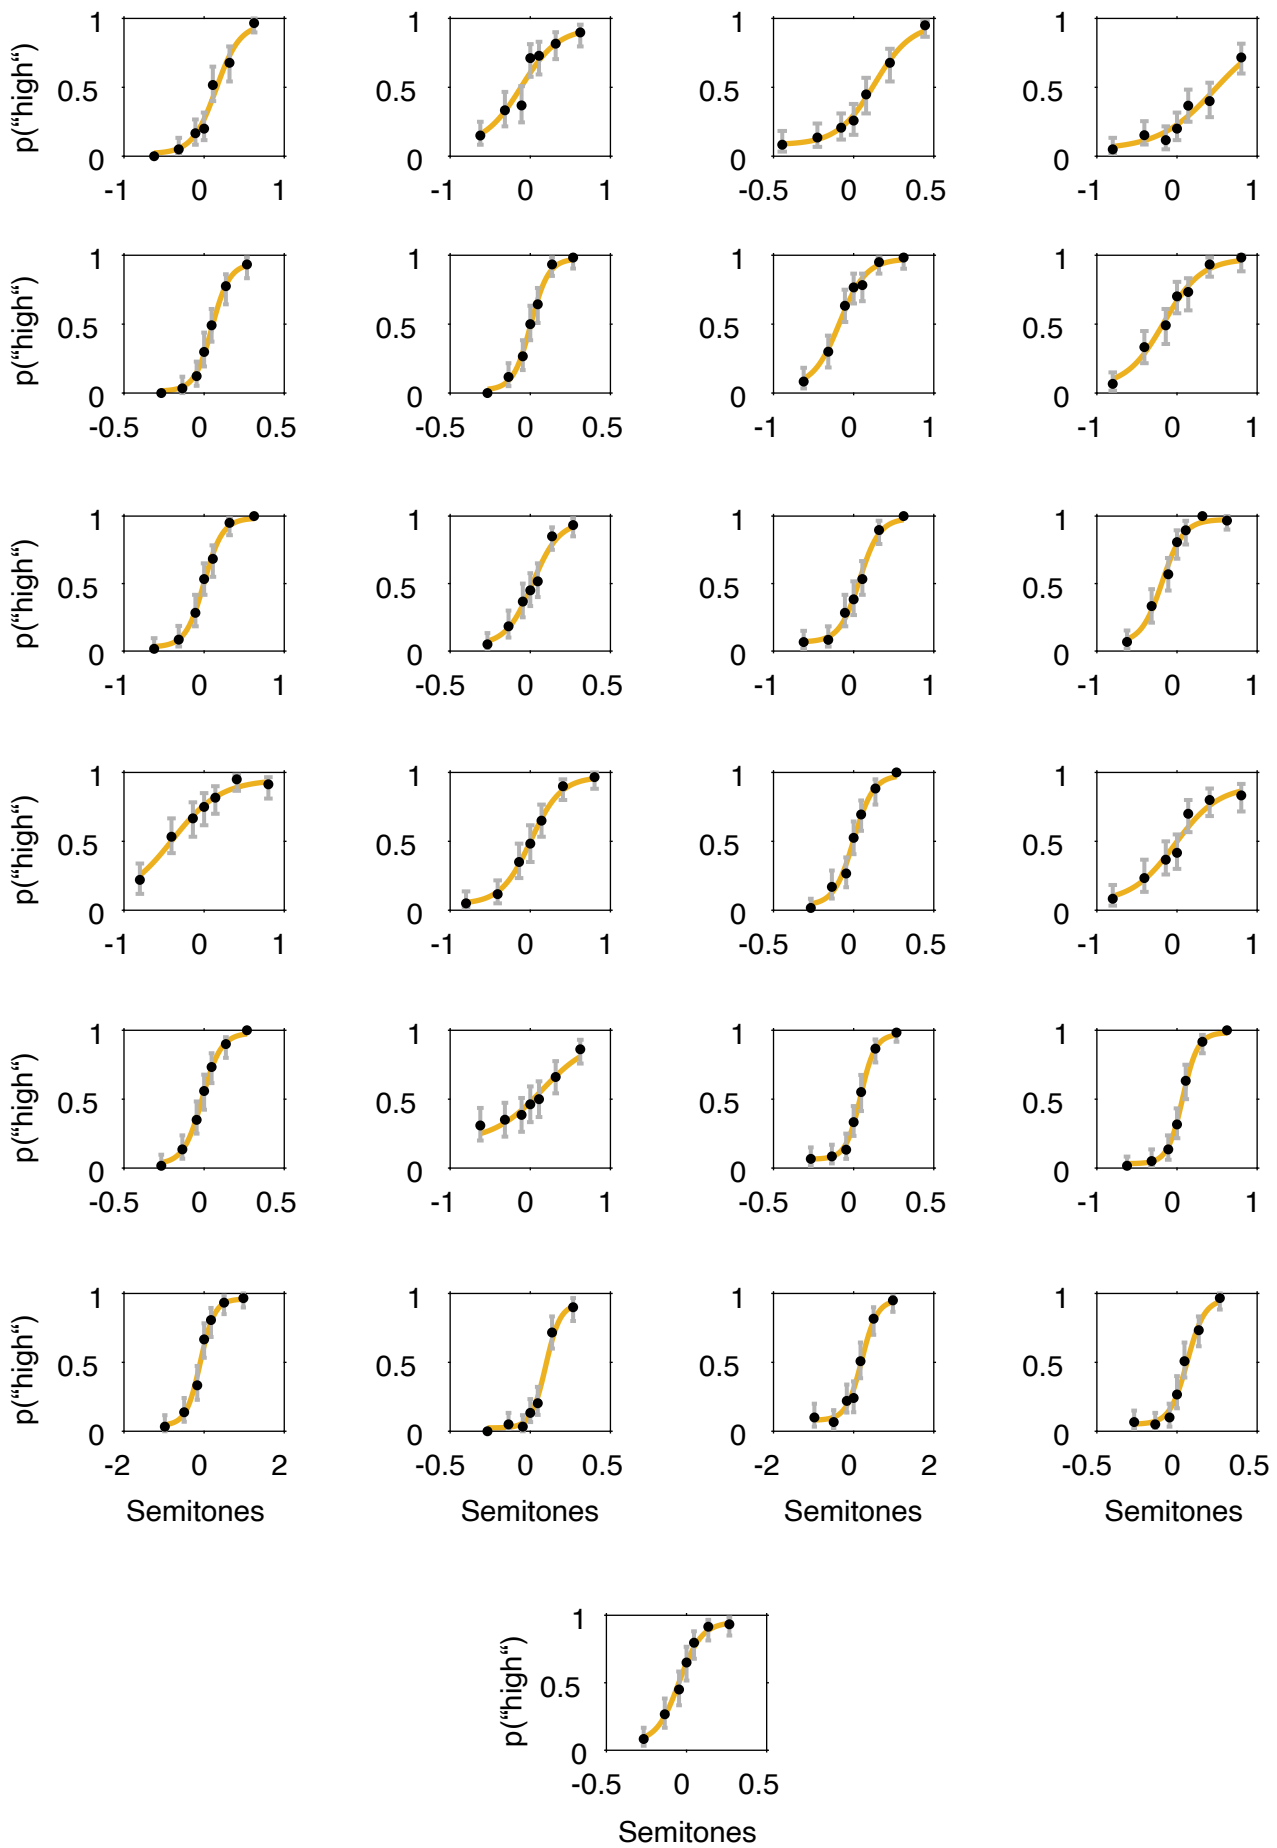

Supplement: supp [file elife-51501-supp-v1.zip › elife_poa_e51501_Figure_5_figure_supplement_2.pdf]

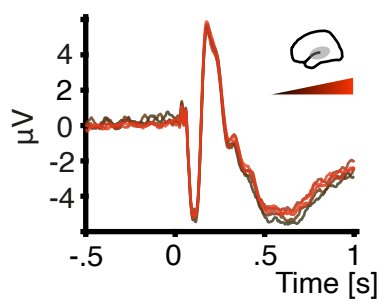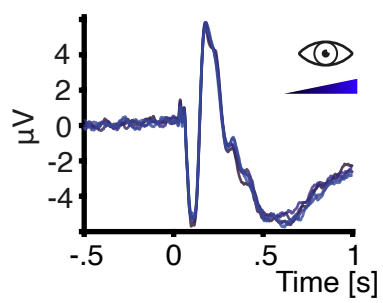

Supplement: supp [file elife-51501-supp-v1.zip › elife_poa_e51501_Figure_4_figure_supplement_1.pdf]

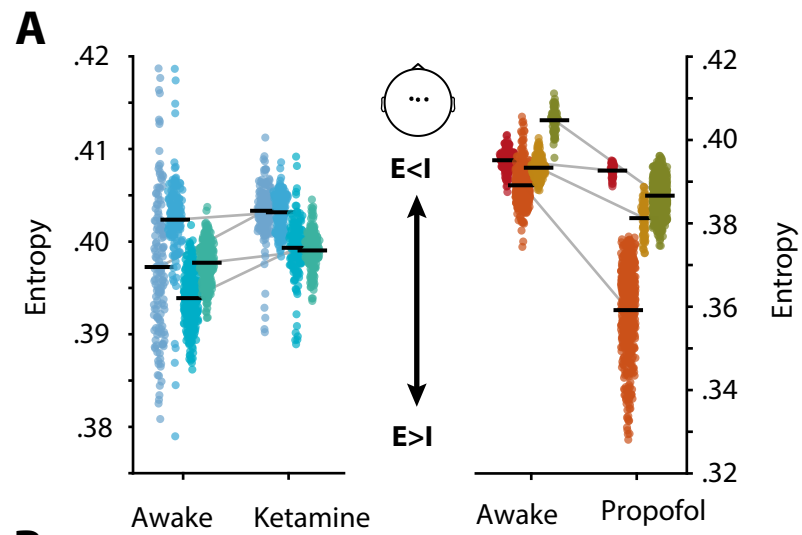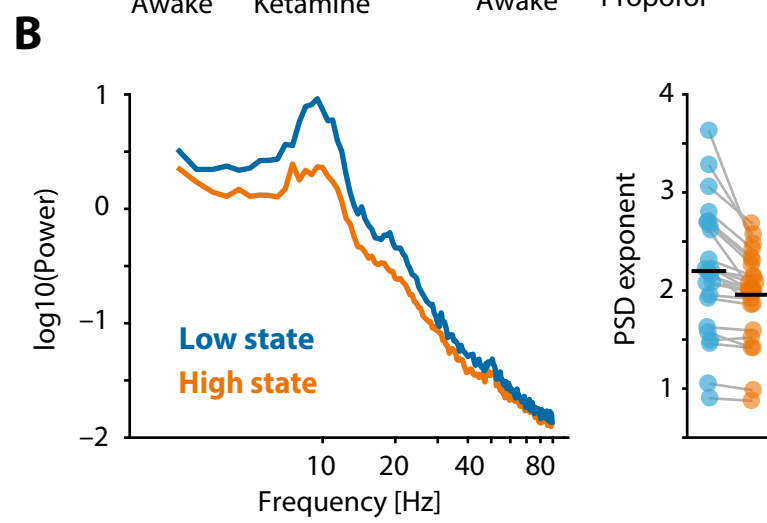

Supplement: supp [file elife-51501-supp-v1.zip › elife_poa_e51501_Figure_2_figure_supplement_1.pdf]

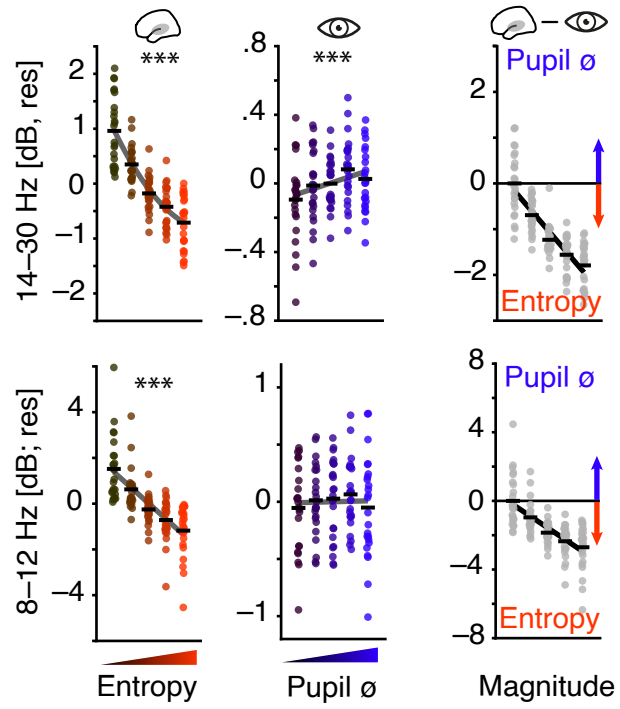

Supplement: supp [file elife-51501-supp-v1.zip › elife_poa_e51501_Figure_3_figure_supplement_1.pdf]
